# Supplementary material
Source: publisher site journal article supplement (https://www.spandidos-publications.com/2523/downloadSupplementary)
Supplement: Supplementary file 1 [file downloadSupplementary]

## Sheet: common lncRNAs in intestine
ProbeName	AM group vs NC group																											H-CP group vs AM group
	P-value (Corr)	P-value	FC (abs)	Regulation	PC-1C:rProcessedSignal(raw)	PC-2C:rProcessedSignal(raw)	PC-3C:rProcessedSignal(raw)	NX-2C:rProcessedSignal(raw)	NX-3C:rProcessedSignal(raw)	NC-1C:rProcessedSignal(raw)	PC-1C:rProcessedSignal(normalized)	PC-2C:rProcessedSignal(normalized)	PC-3C:rProcessedSignal(normalized)	NX-2C:rProcessedSignal(normalized)	NX-3C:rProcessedSignal(normalized)	NC-1C:rProcessedSignal(normalized)	probe-SEQUENCE	Chromosome	Strand	Start	End	targetid	Length(bp)	NONCODE	GeneID	GeneSymbol	Exon_number	P-value (Corr)	P-value	FC (abs)	Regulation	GX-1C:rProcessedSignal(raw)	GX-3C:rProcessedSignal(raw)	GC-2C:rProcessedSignal(raw)	PC-1C:rProcessedSignal(raw)	PC-2C:rProcessedSignal(raw)	PC-3C:rProcessedSignal(raw)	GX-1C:rProcessedSignal(normalized)	GX-3C:rProcessedSignal(normalized)	GC-2C:rProcessedSignal(normalized)	PC-1C:rProcessedSignal(normalized)	PC-2C:rProcessedSignal(normalized)	PC-3C:rProcessedSignal(normalized)	probe-SEQUENCE	Chromosome	Strand	Start	End	targetid
1700030C10Rik	0.72837	0.00718306	2.18439	down	441.875	319.831	331.755	745.594	1224.93	1155.77	8.15558	7.95927	7.93166	8.72364	9.30456	9.4	TAAATTCTCGGCTGTTCCAGACATTCAAGGTCTTTCCCCATGTCTACCAATTATCTGCTT	12	-	824388	835778	NR_015521.1	1792	NONMMUT013617	69513	1700030C10Rik	NC	0.364465	0.00168755	1.69055	up	712.222	729.577	580.016	441.875	319.831	331.755	8.87174	8.81502	8.63224	8.15558	7.95927	7.93166	TAAATTCTCGGCTGTTCCAGACATTCAAGGTCTTTCCCCATGTCTACCAATTATCTGCTT	12	-	824388	835778	NR_015521.1
9130019P16Rik	0.765576	0.0355104	1.7759	up	161.806	173.558	144.751	137.98	130.736	86.8926	6.68672	7.10072	6.75962	6.41008	6.04659	5.60473	TACATCTGGCAACTATGAAAGATTTTCTGTTGGATGGATAAGCCTATAAAGAGCTGCTTT	6	-	54302652	54327341	ENSMUST00000185712	650	NC	ENSMUSG00000073067	9130019P16Rik	NC	0.513292	0.0260058	1.54818	down	110.663	90.6601	127.924	161.806	173.558	144.751	6.27462	5.96926	6.41148	6.68672	7.10072	6.75962	TACATCTGGCAACTATGAAAGATTTTCTGTTGGATGGATAAGCCTATAAAGAGCTGCTTT	6	-	54302652	54327341	ENSMUST00000185712
9130409J20Rik	0.72837	0.010356	1.82982	down	1063.09	921.463	1233.65	2429.17	3152.5	1982.51	9.42032	9.45037	9.78369	10.3742	10.707	10.1883	CGTCATCCAAGCTGACCTACACAACTAATTTATATTTCCTATAGCCTGATTTTGTACTTG	11	+	2021637	2030013	gi|747165441|ref|NR_130645.1|	1200	NONMMUT010272	71576	9130409J20Rik	NC	0.484445	0.0188344	1.83458	up	2131.56	1778.92	2464.78	1063.09	921.463	1233.65	10.4511	10.0731	10.7565	9.42032	9.45037	9.78369	CGTCATCCAAGCTGACCTACACAACTAATTTATATTTCCTATAGCCTGATTTTGTACTTG	11	+	2021637	2030013	gi|747165441|ref|NR_130645.1|
C230014O12Rik	0.722638	0.00348492	3.91998	up	478.959	239.154	369.379	122.935	84.5184	137.181	8.27431	7.55533	8.08251	6.25688	5.52924	6.21349	GTGGAGCCTGAATCCAAACTCAGCCCAAGATATTACTTCTGCTCTGGCTGATTCCATTTT	2	-	33955564	33963255	NONMMUT036798	587	NONMMUT036798	NONMMUG022646.2	C230014O12Rik	2	0.442102	0.0112946	4.39294	down	52.5826	51.9963	155.1	478.959	239.154	369.379	5.42865	5.38352	6.69442	8.27431	7.55533	8.08251	GTGGAGCCTGAATCCAAACTCAGCCCAAGATATTACTTCTGCTCTGGCTGATTCCATTTT	2	-	33955564	33963255	NONMMUT036798
Gm10768	0.72837	0.0106473	4.54964	down	169.138	370.879	220.562	1428.85	1114.47	1798.19	6.7482	8.16861	7.35693	9.62245	9.16476	10.0438	CACGAAGTTCTTAGTTTAGCAAATTCATTTCTGGGACTATTTTAGATAAGTATGGAGGAC	19	+	3878802	3880844	NR_033472.1	2043	NC	100038628	Gm10768	NC	0.516602	0.0281077	3.62641	up	1350.92	1183.58	554.9	169.138	370.879	220.562	9.79015	9.49129	8.56793	6.7482	8.16861	7.35693	CACGAAGTTCTTAGTTTAGCAAATTCATTTCTGGGACTATTTTAGATAAGTATGGAGGAC	19	+	3878802	3880844	NR_033472.1
Gm15734	0.621877	0.000994495	1.55448	up	885.348	784.15	823.541	644.581	694.793	718.447	9.15623	9.23341	9.2116	8.52687	8.46537	8.6997	GGGAAAAGTGGGAGGCACCACAGCACATTATAAACATATTTGAAATTGCCAAAGAATAAA	5	-	9264222	9266022	NONMMUT051219	1045	NONMMUT051219	NONMMUG031744.2	Gm15734	2	0.0152403	4.7482e-07	2.71092	down	326.281	336.028	318.077	885.348	784.15	823.541	7.77561	7.75027	7.75902	9.15623	9.23341	9.2116	GGGAAAAGTGGGAGGCACCACAGCACATTATAAACATATTTGAAATTGCCAAAGAATAAA	5	-	9264222	9266022	NONMMUT051219
Gm15889	0.72837	0.0117191	4.09069	up	784.762	579.355	464.278	308.509	131.79	168.815	8.9806	8.80984	8.40791	7.51529	6.05531	6.53072	CCCCCTATACAAATTCTGTATAAAGTTGACTAGTCCCATAGATATTAACCGCTAATTGTT	8	+	96901748	96907137	NONMMUT066764	4076	NONMMUT066764	NONMMUG041323.2	Gm15889	2	0.474622	0.0160042	2.65409	down	256.392	346.472	160.448	784.762	579.355	464.278	7.43544	7.79298	6.74529	8.9806	8.80984	8.40791	CCCCCTATACAAATTCTGTATAAAGTTGACTAGTCCCATAGATATTAACCGCTAATTGTT	8	+	96901748	96907137	NONMMUT066764
Gm15967	0.762346	0.0314589	1.59401	down	175.276	94.3134	159.613	279.846	292.869	297.776	6.79813	6.26209	6.90235	7.37904	7.20764	7.39386	TGATGAAAGGCCAACGTTTGAATGTATTCAGTCCTTGGAAGACTACGTCACTGCTGCAGA	19	-	7770389	7771504	NONMMUT033763	1116	NONMMUT033763	NONMMUG020750.2	Gm15967	1	0.475203	0.016567	1.77744	up	282.733	285.83	241.593	175.276	94.3134	159.613	7.57283	7.52477	7.35437	6.79813	6.26209	6.90235	TGATGAAAGGCCAACGTTTGAATGTATTCAGTCCTTGGAAGACTACGTCACTGCTGCAGA	19	-	7770389	7771504	NONMMUT033763
Gm16143	0.748516	0.021162	2.19972	up	781.186	484.753	397.998	372.601	354.812	238.433	8.9744	8.55526	8.19203	7.77487	7.4844	7.05046	CCCCACCCTTGGCTACCTAGACCACTGTCCTCAAGGAGAATAAAAATAGAAGGCACCCCA	10	-	3115602	3117632	gi|568896880|ref|XR_392942.1|	532	NC	102632251	Gm16143	NC	0.413719	0.00766139	2.429	down	211.131	289.488	215.027	781.186	484.753	397.998	7.16288	7.54096	7.17677	8.9744	8.55526	8.19203	CCCCACCCTTGGCTACCTAGACCACTGTCCTCAAGGAGAATAAAAATAGAAGGCACCCCA	10	-	3115602	3117632	gi|568896880|ref|XR_392942.1|
Gm26698	0.785134	0.0471104	1.99202	up	301.331	156.968	176.709	155.437	170.522	88.7356	7.58698	6.96434	7.04724	6.57363	6.41218	5.63006	CTAAAGGCACTAAATAAATCTTTAACACTTTAACAGCTTTGTCTTCATCCACATCCCCAC	12	-	1976322	1977769	gi|755484642|ref|XR_394696.2|	1255	NONMMUT015109	102635544	Gm26698	NC	0.485332	0.0197448	2.04109	down	118.318	123.242	80.5228	301.331	156.968	176.709	6.36719	6.35663	5.7867	7.58698	6.96434	7.04724	CTAAAGGCACTAAATAAATCTTTAACACTTTAACAGCTTTGTCTTCATCCACATCCCCAC	12	-	1976322	1977769	gi|755484642|ref|XR_394696.2|
Gm30346	0.722638	0.00253714	1.6761	down	110.016	86.495	97.4824	216.2	260.024	189.299	6.15536	6.15134	6.21608	7.02783	7.02829	6.70199	ATCTGGGGCTTATTGTTATCACATTGCTTCATTCCTTCAATCCATCACCACACACACAGG	10	+	3667040	3672281	gi|755482312|ref|XR_885536.1|	1503	NC	102632206	Gm30346	NC	0.541855	0.0362423	1.58915	up	186.71	129.134	206.296	110.016	86.495	97.4824	6.99432	6.41896	7.11426	6.15536	6.15134	6.21608	ATCTGGGGCTTATTGTTATCACATTGCTTCATTCCTTCAATCCATCACCACACACACAGG	10	+	3667040	3672281	gi|755482312|ref|XR_885536.1|
Gm33104	0.76988	0.0366674	1.51974	up	695.823	562.299	687.922	453.591	768.23	463.769	8.80216	8.77267	8.95498	8.04737	8.61388	8.05708	AGAAATGAATACACTGACCAGAGGATGTCAGAACCTCACAGGCAACTTGCTCCCTAATGT	10	+	4501634	4522030	gi|755481867|ref|XR_392752.2|	1201	NC	102635880	Gm33104	NC	0.569815	0.0492055	2.33685	down	212.922	573.436	217.609	695.823	562.299	687.922	7.17408	8.48848	7.19355	8.80216	8.77267	8.95498	AGAAATGAATACACTGACCAGAGGATGTCAGAACCTCACAGGCAACTTGCTCCCTAATGT	10	+	4501634	4522030	gi|755481867|ref|XR_392752.2|
Gm33308	0.72837	0.0113359	2.67152	up	315.005	137.193	280.304	108.418	128.277	97.4484	7.65095	6.77122	7.69799	6.09518	6.02303	5.74897	TTCATTCCTGGCAAAGGAATGGACAACAGCCAGCTAGAAAAGGAAACTTCTGACCTCCTT	12	+	2276407	2278616	gi|755541992|ref|XR_381434.2|	570	NONMMUT013854	102636165	Gm33308	NC	0.460168	0.0138793	2.63962	down	108.972	85.1878	79.2881	315.005	137.193	280.304	6.25441	5.89757	5.76719	7.65095	6.77122	7.69799	TTCATTCCTGGCAAAGGAATGGACAACAGCCAGCTAGAAAAGGAAACTTCTGACCTCCTT	12	+	2276407	2278616	gi|755541992|ref|XR_381434.2|
Gm36732	0.72837	0.00697814	2.98921	up	225.472	106.221	176.584	67.6461	40.2416	75.9726	7.16548	6.42313	7.04622	5.55928	4.88917	5.44709	TTCCAGAAAGAACCCTCATTTAGACACGAGATGCAATAGCCTGAACCCAACCACTGACAA	5	-	2212195	2215021	gi|568891772|ref|XR_402399.1|	714	NONMMUT051821	102640735	Gm36732	NC	0.445524	0.0117037	3.04547	down	35.0245	29.1977	83.4718	225.472	106.221	176.584	5.07768	4.90693	5.83023	7.16548	6.42313	7.04622	TTCCAGAAAGAACCCTCATTTAGACACGAGATGCAATAGCCTGAACCCAACCACTGACAA	5	-	2212195	2215021	gi|568891772|ref|XR_402399.1|
Hyi	0.758738	0.0235702	1.77431	up	190.671	168.869	174.967	149.19	155.766	97.1835	6.92554	7.06635	7.03334	6.51522	6.28393	5.74429	GTTAAGCTTTCTGTAAGGGCAAGGATCAAAATCATTTAAAAAGGTGAGCCTCGGGGCTGG	4	+	118032604	118033899	NONMMUT048964	1296	NONMMUT048964;NONMMUT048965	NONMMUG030415.2	Hyi	1	0.332089	0.000217118	1.79204	down	100.664	99.901	114.94	190.671	168.869	174.967	6.15097	6.08852	6.26093	6.92554	7.06635	7.03334	GTTAAGCTTTCTGTAAGGGCAAGGATCAAAATCATTTAAAAAGGTGAGCCTCGGGGCTGG	4	+	118032604	118033899	NONMMUT048964
LOC105242395	0.762346	0.0278992	1.75821	up	196.608	144.52	133.346	94.1864	171.39	91.4953	6.97245	6.84632	6.63801	5.92782	6.41952	5.66713	GCAGATCTGAAATTGTGTGGAGAAGATAAACTCCATGTGTGTGATGATTAATTTTCTTTC	13	-	2938666	2945077	gi|755485520|ref|XR_874353.1|	3644	NONMMUT017922	105242395	LOC105242395	NC	0.396034	0.00393563	1.65949	down	107.258	94.4038	95.679	196.608	144.52	133.346	6.23549	6.02013	6.00894	6.97245	6.84632	6.63801	GCAGATCTGAAATTGTGTGGAGAAGATAAACTCCATGTGTGTGATGATTAATTTTCTTTC	13	-	2938666	2945077	gi|755485520|ref|XR_874353.1|
LOC105243282	0.72837	0.00547387	2.01353	up	207.072	116.774	189.586	88.2698	118.825	111.101	7.04108	6.5473	7.14046	5.85245	5.92891	5.91831	TTTATCAAGAACTAACGAAGTCAGACCATGGACACAGCCAAAATAAATAATTCCTCCTGC	8	-	4250218	4355333	gi|755480465|ref|XR_863593.1|	4224	NC	105243282	LOC105243282	NC	0.413351	0.00689159	2.20419	down	90.1161	71.8624	67.7788	207.072	116.774	189.586	6.01192	5.70984	5.58633	7.04108	6.5473	7.14046	TTTATCAAGAACTAACGAAGTCAGACCATGGACACAGCCAAAATAAATAATTCCTCCTGC	8	-	4250218	4355333	gi|755480465|ref|XR_863593.1|
LOC105243318	0.785134	0.0475325	1.52446	up	3533.22	3581.3	3475.27	3030.71	3865.84	2144.02	11.1968	11.3876	11.2637	10.6958	11.0232	10.3041	AGAGAGGTCCATTTGAGTTGGTCGTAGTGACAGTGAGCTTCTCTGGAAATTGCGTATCCT	8	-	3594757	3595409	gi|755528033|ref|XR_879317.1|	443	NC	105243318	LOC105243318	NC	0.437594	0.0107213	1.67247	down	2748.51	2093.4	2035.74	3533.22	3581.3	3475.27	10.8341	10.3093	10.4787	11.1968	11.3876	11.2637	AGAGAGGTCCATTTGAGTTGGTCGTAGTGACAGTGAGCTTCTCTGGAAATTGCGTATCCT	8	-	3594757	3595409	gi|755528033|ref|XR_879317.1|
LOC105244083	0.722638	0.00292819	1.54554	up	1117.87	785.866	847.664	775.014	765.345	729.59	9.49561	9.23891	9.25135	8.77443	8.60732	8.71977	TAGATTTGCGCAGGCTAGGAACTGGGAGAAATGAAGACAGAGAATGGCGAACACTCAGGG	2	-	1692687	1704587	gi|755472050|ref|XR_885598.1|	436	NC	105244083	LOC105244083	NC	0.357489	0.00130312	1.62899	down	618.803	616.89	574.996	1117.87	785.866	847.664	8.67287	8.58206	8.619	9.49561	9.23891	9.25135	TAGATTTGCGCAGGCTAGGAACTGGGAGAAATGAAGACAGAGAATGGCGAACACTCAGGG	2	-	1692687	1704587	gi|755472050|ref|XR_885598.1|
LOC105244174	0.748041	0.0205239	2.07149	down	419.882	343.386	377.859	1207.9	1342.07	658.416	8.07795	8.06356	8.1126	9.39331	9.4413	8.57151	AAACTCTTGTTCACTGTGTAAAAGCATTCACCTGTCAATAAAAGGCTTATTGGCCAATGA	11	-	4027446	4032101	gi|755483297|ref|XR_866311.1|	582	NC	105244174	LOC105244174	NC	0.332089	0.000142639	1.85023	up	830.872	807.404	682.562	419.882	343.386	377.859	9.08595	8.95322	8.87806	8.07795	8.06356	8.1126	AAACTCTTGTTCACTGTGTAAAAGCATTCACCTGTCAATAAAAGGCTTATTGGCCAATGA	11	-	4027446	4032101	gi|755483297|ref|XR_866311.1|
LOC105244658	0.690763	0.00145322	2.32514	up	1033.66	786.685	1033.69	443.763	521.756	594.117	9.3766	9.2409	9.53023	8.0169	8.05104	8.42784	TTCTCCATGAGGACAGACATGGAGCAGAGCAAGTCAAGGAGAGACAAAATATAGGAGTGA	4	-	4439905	4456622	gi|755508910|ref|XR_868021.1|	729	NONMMUT048752	105244658	LOC105244658	NC	0.396034	0.00442835	1.68253	down	563.511	589.959	661.576	1033.66	786.685	1033.69	8.53918	8.52649	8.83015	9.3766	9.2409	9.53023	TTCTCCATGAGGACAGACATGGAGCAGAGCAAGTCAAGGAGAGACAAAATATAGGAGTGA	4	-	4439905	4456622	gi|755508910|ref|XR_868021.1|
LOC105245997	0.72837	0.00453645	2.80731	up	690.925	380.035	482.025	248.942	195.701	255.024	8.79085	8.20225	8.45939	7.22015	6.60643	7.15834	AAGGGGGCAAAAGAGCCTGAACCAATGCCTTTTACATAGTGGGCATCAAGGAATGCTATT	15	+	1262230	1268436	gi|755552650|ref|XR_875497.1|	6159	NC	105245997	LOC105245997	NC	0.513292	0.0256748	3.55133	down	75.6206	149.903	272.72	690.925	380.035	482.025	5.80755	6.62381	7.53605	8.79085	8.20225	8.45939	AAGGGGGCAAAAGAGCCTGAACCAATGCCTTTTACATAGTGGGCATCAAGGAATGCTATT	15	+	1262230	1268436	gi|755552650|ref|XR_875497.1|
LOC105246748	0.785134	0.0474788	2.87083	down	231.519	465.346	303.192	671.107	1693.78	1424.29	7.20457	8.4957	7.8055	8.58174	9.77499	9.71343	AAACCTACTCATACAAAACAGAGCCGGAGAGCCTTATTGTCTCTTACCGAGAGCCTAATC	3	+	1516356	1563853	gi|755473636|ref|XR_886559.1|	226	NC	105246748	LOC105246748	NC	0.490633	0.0211883	2.6508	up	987.172	884.63	905.973	231.519	465.346	303.192	9.34866	9.07872	9.29766	7.20457	8.4957	7.8055	AAACCTACTCATACAAAACAGAGCCGGAGAGCCTTATTGTCTCTTACCGAGAGCCTAATC	3	+	1516356	1563853	gi|755473636|ref|XR_886559.1|
LOC105247091	0.218324	8.27726e-06	1.59645	up	411.182	337.778	355.663	284.97	321.186	288.335	8.04762	8.04047	8.02917	7.40902	7.33746	7.34617	AGACTAAATCAGTTGTGTGCCCTGCATAACCTGTGACTTGACAGAAATGGAAGCAAAGCG	4	+	1782102	1786928	gi|755506984|ref|XR_881086.1|	2247	NC	105247091	LOC105247091	NC	0.541234	0.03617	1.80135	down	158.127	211.408	306.246	411.182	337.778	355.663	6.76482	7.10399	7.70121	8.04762	8.04047	8.02917	AGACTAAATCAGTTGTGTGCCCTGCATAACCTGTGACTTGACAGAAATGGAAGCAAAGCG	4	+	1782102	1786928	gi|755506984|ref|XR_881086.1|
LOC105247673	0.752294	0.0219851	1.88943	up	629.681	414.403	317.934	241.891	328.093	331.718	8.66086	8.32039	7.87115	7.17997	7.36986	7.54872	ACATTCAGAAGTACTTGTGTATAGGCCTGAATACCTGAGTTTGACCCCAGACTCCACAAG	5	+	4308346	4308589	gi|755476807|ref|XR_888673.1|	246	NC	105247673	LOC105247673	NC	0.428143	0.00941446	2.25856	down	207.291	185.301	228.74	629.681	414.403	317.934	7.13833	6.91701	7.27084	8.66086	8.32039	7.87115	ACATTCAGAAGTACTTGTGTATAGGCCTGAATACCTGAGTTTGACCCCAGACTCCACAAG	5	+	4308346	4308589	gi|755476807|ref|XR_888673.1|
Mir143hg	0.748516	0.0210326	1.96955	up	513.025	345.627	264.257	243.613	289.194	195.262	8.37269	8.0739	7.61533	7.19132	7.18917	6.74783	AGGGGGTGGATATCACCTTCCTCTCTATGTTCTGTGACAGTAATAAAGTACTGGACTTTT	18	-	1705877	1725537	NR_045402.1	1381	NONMMUT032603;NONMMUT032609	328968	Mir143hg	NC	0.535775	0.0340704	1.84635	down	245.523	231.737	166.489	513.025	345.627	264.257	7.37305	7.23407	6.80078	8.37269	8.0739	7.61533	AGGGGGTGGATATCACCTTCCTCTCTATGTTCTGTGACAGTAATAAAGTACTGGACTTTT	18	-	1705877	1725537	NR_045402.1
NONMMUT003769	0.72837	0.00964414	1.57683	up	231.128	222.336	231.878	176.966	236.215	163.911	7.20238	7.45258	7.42676	6.74592	6.88123	6.48348	TTGTTATTCATTGTTGATCGATCACACCAGTGTTCCTTTCTGTGACTTTGTTCCCTGCCT	1	+	173200949	173201773	NONMMUT003769	728	NONMMUT003769	NONMMUG002423.1	NC	2	0.513292	0.0254128	1.63721	down	190.872	133.123	131.899	231.128	222.336	231.878	7.02627	6.46232	6.45939	7.20238	7.45258	7.42676	TTGTTATTCATTGTTGATCGATCACACCAGTGTTCCTTTCTGTGACTTTGTTCCCTGCCT	1	+	173200949	173201773	NONMMUT003769
NONMMUT004918	0.621877	0.000736975	2.02189	up	186.757	152.504	145.756	98.4148	116.39	90.5591	6.89223	6.92514	6.76954	5.98019	5.90431	5.65529	CAGTACATAACTGAGCCAACACAGATGGCAGGATAAAGAAGATCTGAGAGATGGTTGGAA	10	-	19986284	20006437	NONMMUT004918	1245	NONMMUT004918	NONMMUG003156.2	NC	4	0.38315	0.00225429	1.61187	down	116.667	98.9431	102.147	186.757	152.504	145.756	6.34735	6.07644	6.09691	6.89223	6.92514	6.76954	CAGTACATAACTGAGCCAACACAGATGGCAGGATAAAGAAGATCTGAGAGATGGTTGGAA	10	-	19986284	20006437	NONMMUT004918
NONMMUT005727	0.621877	0.00030499	2.21033	up	6133.61	6807.71	6495.7	4073.16	4209.65	3509.95	12.0862	12.401	12.2446	11.1193	11.1501	11.0296	AAATGTGGGGCAGGGGCAATACAGAAAATGAGATTGGACCTCAGTAAAGGGATATAAGTA	10	+	3383684	3386645	ri|A130099P19|PX00126N03|2964	2964	NONMMUT005727	NC	NC	NC	0.489312	0.0204403	1.92168	down	3389.89	3354.57	4686.91	6133.61	6807.71	6495.7	11.1501	10.9896	11.765	12.0862	12.401	12.2446	AAATGTGGGGCAGGGGCAATACAGAAAATGAGATTGGACCTCAGTAAAGGGATATAAGTA	10	+	3383684	3386645	ri|A130099P19|PX00126N03|2964
NONMMUT005994	0.762346	0.027718	1.69927	up	1108.01	766.963	790.333	778.22	786.226	481.89	9.48107	9.20398	9.15561	8.78199	8.64508	8.11886	GCTGGTCAGTTTGTTAGATTTAATGTTTGTTTTATGTCATGGATTAGGTACTAGAACCAC	10	+	66680488	66681104	NONMMUT005994	522	NONMMUT005994	NONMMUG003859.1	NC	2	0.544951	0.0381332	1.52266	down	696.361	750.664	472.445	1108.01	766.963	790.333	8.83676	8.85299	8.33114	9.48107	9.20398	9.15561	GCTGGTCAGTTTGTTAGATTTAATGTTTGTTTTATGTCATGGATTAGGTACTAGAACCAC	10	+	66680488	66681104	NONMMUT005994
NONMMUT007707	0.72837	0.012702	1.60251	up	151.41	136.431	131.703	101.643	148.267	94.039	6.5904	6.76493	6.62055	6.01817	6.21409	5.70263	CCATAATGGTCAAAGGAGGAAACCATCCCCTTACATGTAACTTATATATTTATTTCAACC	10	+	120258824	120262373	NONMMUT007707	3553	NONMMUT007707	NONMMUG004879.2	NC	1	0.332089	0.000596484	1.9358	down	64.6226	65.7348	85.8065	151.41	136.431	131.703	5.63655	5.61455	5.86599	6.5904	6.76493	6.62055	CCATAATGGTCAAAGGAGGAAACCATCCCCTTACATGTAACTTATATATTTATTTCAACC	10	+	120258824	120262373	NONMMUT007707
NONMMUT010061	0.762346	0.0285901	2.10645	up	395.352	322.776	343.978	225.629	324.36	143.689	7.99084	7.97351	7.98196	7.08557	7.35205	6.28425	GGAAGAGATATAGCTCCCTAAAATGAAGAAACGATGCAGAGGTTATATGTGTATTTGGGG	11	+	856305	857240	ri|1110055C04|R000018F03|937	937	NONMMUT010061	NC	NC	NC	0.413719	0.00818176	1.64382	down	258.418	256.918	187.74	395.352	322.776	343.978	7.4473	7.37364	6.97423	7.99084	7.97351	7.98196	GGAAGAGATATAGCTCCCTAAAATGAAGAAACGATGCAGAGGTTATATGTGTATTTGGGG	11	+	856305	857240	ri|1110055C04|R000018F03|937
NONMMUT012528	0.72837	0.00986136	1.79541	up	472.78	333.104	293.179	270.591	247.343	264.71	8.25404	8.01983	7.76019	7.33707	6.95021	7.21382	ATTTATGTAAACTTGGACTAAGAATAAAGTGGTGTGGAGTCCTGAAATAGGAGAGGAGGA	11	+	109301392	109314673	NONMMUT012528	1776	NONMMUT012528	NONMMUG007951.1	NC	2	0.568713	0.0481244	1.51899	down	297.923	274.58	205.098	472.78	333.104	293.179	7.6505	7.46814	7.10608	8.25404	8.01983	7.76019	ATTTATGTAAACTTGGACTAAGAATAAAGTGGTGTGGAGTCCTGAAATAGGAGAGGAGGA	11	+	109301392	109314673	NONMMUT012528
NONMMUT013822	0.722638	0.00186648	2.15612	up	126.606	84.528	126.105	46.9427	53.804	71.9934	6.33926	6.12292	6.56086	5.21757	5.0954	5.38476	ACAACCATTCAAAAGGGGCCTGAACCTCTGAAACTGAGTCAAAACAAATCTGTTCTCCCC	12	+	31595395	31595944	NONMMUT013822	219	NONMMUT013822	NONMMUG008738.2	NC	2	0.396034	0.00517189	2.20298	down	40.1975	29.9148	61.8463	126.606	84.528	126.105	5.19143	4.92621	5.48704	6.33926	6.12292	6.56086	ACAACCATTCAAAAGGGGCCTGAACCTCTGAAACTGAGTCAAAACAAATCTGTTCTCCCC	12	+	31595395	31595944	NONMMUT013822
NONMMUT015244	0.762346	0.0309404	2.10651	up	1263.59	537.956	1094.51	543.564	520.336	584.886	9.66979	8.70505	9.60509	8.29932	8.04737	8.40869	GAGGAGGCCAAAAGACATATAATAGAACATATTAAGGCATTGCCCTTAACTTTCTAAAGT	12	-	2972661	2975193	ri|F830017C03|PM00023H14|1346	1346	NONMMUT015244;NONMMUT057317	NC	NC	NC	0.386794	0.00284985	6.52497	down	143.425	209.634	105.743	1263.59	537.956	1094.51	6.62779	7.09161	6.14262	9.66979	8.70505	9.60509	GAGGAGGCCAAAAGACATATAATAGAACATATTAAGGCATTGCCCTTAACTTTCTAAAGT	12	-	2972661	2975193	ri|F830017C03|PM00023H14|1346
NONMMUT015616	0.775478	0.037742	1.50687	up	1217.14	682.593	1039.38	716.514	904.129	818.996	9.61894	9.04056	9.53641	8.67016	8.85673	8.89437	ATATCTTTATGCAGAGGACACAGCCAGCTTCCCAAATGCAGAGTGACATTATTGGGAACG	12	-	2568268	2589127	ri|4631419H05|PX00102G10|3253	3253	NONMMUT015616	NC	NC	NC	0.396034	0.0053538	2.07788	down	474.622	487.709	521.066	1217.14	682.593	1039.38	8.29696	8.26095	8.47268	9.61894	9.04056	9.53641	ATATCTTTATGCAGAGGACACAGCCAGCTTCCCAAATGCAGAGTGACATTATTGGGAACG	12	-	2568268	2589127	ri|4631419H05|PX00102G10|3253
NONMMUT020438	0.722638	0.00335001	1.50168	down	1665.39	1671.5	1673.93	3451.35	3044.44	3013.89	10.0661	10.2961	10.2107	10.8748	10.6524	10.8055	ACAGAACCAAAATTGCAGGAACTAAAAACTCTCTAGACCATCCATGGTGTATTCCTCCAG	14	+	41263213	41270431	NONMMUT020438	1273	NONMMUT020438	NONMMUG012689.2	NC	2	0.435079	0.0103096	1.86773	up	3377.06	4308.37	2449.36	1665.39	1671.5	1673.93	11.1445	11.3847	10.7476	10.0661	10.2961	10.2107	ACAGAACCAAAATTGCAGGAACTAAAAACTCTCTAGACCATCCATGGTGTATTCCTCCAG	14	+	41263213	41270431	NONMMUT020438
NONMMUT024235	0.762346	0.0280711	2.57171	up	108.886	137.943	203.302	81.6415	74.5094	44.4354	6.14013	6.77799	7.24462	5.76199	5.40357	4.90901	AATTGGGTTCAGAAGACTGGATGTCTATAGTCCCATACCATGGACTATAGTTGGGAGGCA	15	+	79744986	79746213	NONMMUT024235	1038	NONMMUT024235	NONMMUG014978.2	NC	2	0.539362	0.035155	3.19485	down	24.851	24.6204	88.3047	108.886	137.943	203.302	4.62453	4.60795	5.90302	6.14013	6.77799	7.24462	AATTGGGTTCAGAAGACTGGATGTCTATAGTCCCATACCATGGACTATAGTTGGGAGGCA	15	+	79744986	79746213	NONMMUT024235
NONMMUT025228	0.762346	0.027418	5.16634	down	958.869	348.735	472.79	3205.42	7389.57	1776.37	9.2724	8.08583	8.43178	10.7801	12.0898	10.0276	ATGTCCAATGCTACCCTCTCTGTATACTTTGTGAAAGTAAGTCCACTGTGGCCAGAGTCT	16	+	4037276	4038260	NONMMUT025228	726	NONMMUT025228	NONMMUG015613.1	NC	3	0.413719	0.00707428	4.13179	up	3128.82	2210.35	2093.39	958.869	348.735	472.79	11.0258	10.3837	10.5208	9.2724	8.08583	8.43178	ATGTCCAATGCTACCCTCTCTGTATACTTTGTGAAAGTAAGTCCACTGTGGCCAGAGTCT	16	+	4037276	4038260	NONMMUT025228
NONMMUT028976	0.748516	0.0214109	1.979	up	195.854	132.069	206.172	118.174	149.253	84.0145	6.96607	6.71715	7.26412	6.20414	6.22483	5.56404	GCCTAATTACACTCTGATGGCTTAGTTGTCTTTATTTTACTACAGTTCTCTCTAGTTAGT	17	-	29124878	29128363	NONMMUT028976	450	NONMMUT028976	NONMMUG017907.1	NC	2	0.557179	0.0435275	1.67128	down	141.277	108.333	89.6051	195.854	132.069	206.172	6.60868	6.19177	5.92403	6.96607	6.71715	7.26412	GCCTAATTACACTCTGATGGCTTAGTTGTCTTTATTTTACTACAGTTCTCTCTAGTTAGT	17	-	29124878	29128363	NONMMUT028976
NONMMUT030317	0.758738	0.026581	1.50607	up	746.864	649.385	601.213	660.88	624.343	447.848	8.90557	8.97033	8.76887	8.56038	8.31099	8.00104	CATCCATCAGATTTGTACATAGGCCCAAGTCAAGAGTCAGGGTTTTTAAAAAAGAAGAAA	17	-	1564125	1567930	ri|B930083G24|PX00665D07|3805	3805	NONMMUT030317	NC	NC	NC	0.553443	0.0407907	1.53605	down	561.494	530.355	345.426	746.864	649.385	601.213	8.53479	8.37797	7.87435	8.90557	8.97033	8.76887	CATCCATCAGATTTGTACATAGGCCCAAGTCAAGAGTCAGGGTTTTTAAAAAAGAAGAAA	17	-	1564125	1567930	ri|B930083G24|PX00665D07|3805
NONMMUT030906	0.722638	0.00316635	2.20506	up	505.915	416.229	437.99	283.124	324.243	206.417	8.35179	8.32677	8.3284	7.39671	7.35143	6.83636	TGTACAAATGTAGAGGTCAGAAGTCAAACATTGGGTGTCTCCTTCTATGGATGAAGCCCC	17	-	84533432	84536913	NONMMUT030906	1656	NONMMUT030906	NONMMUG019058.2	NC	4	0.386794	0.00240856	2.90653	down	215.728	168.445	127.927	505.915	416.229	437.99	7.19199	6.78552	6.41155	8.35179	8.32677	8.3284	TGTACAAATGTAGAGGTCAGAAGTCAAACATTGGGTGTCTCCTTCTATGGATGAAGCCCC	17	-	84533432	84536913	NONMMUT030906
NONMMUT035103	0.728658	0.0135784	1.74284	up	226.856	147.813	183.254	153.17	149.736	114.866	7.17468	6.88109	7.09711	6.55121	6.23011	5.96725	GCATGTATGAGTAGCTTAAATAAATGCATGATTACTAATGGACTTTCTTCCTCTACTTGG	19	-	54003363	54004345	NONMMUT035103	984	NONMMUT035103;NONMMUT035104	NONMMUG021624.2	NC	1	0.468833	0.0154247	1.5479	down	144.231	130.529	109.687	226.856	147.813	183.254	6.63531	6.43503	6.1916	7.17468	6.88109	7.09711	GCATGTATGAGTAGCTTAAATAAATGCATGATTACTAATGGACTTTCTTCCTCTACTTGG	19	-	54003363	54004345	NONMMUT035103
NONMMUT036305	0.72837	0.00876626	1.75437	up	293.146	206.125	187.843	132.809	177.314	196.556	7.54922	7.34333	7.12928	6.36149	6.46885	6.75863	TAGTACTGCTGAGTCCTTGGTCTCCCAGGTCCCTTGTTTGGCTAGTGGCCTCAAAGCTCG	2	+	26194951	26200851	NONMMUT036305	794	NONMMUT036305	NONMMUG022342.1	NC	4	0.426875	0.00920557	1.73406	down	113.77	151.194	154.43	293.146	206.125	187.843	6.31448	6.63689	6.688	7.54922	7.34333	7.12928	TAGTACTGCTGAGTCCTTGGTCTCCCAGGTCCCTTGTTTGGCTAGTGGCCTCAAAGCTCG	2	+	26194951	26200851	NONMMUT036305
NONMMUT040018	0.72837	0.00689583	3.44801	up	408.77	239.627	346.832	135.018	168.822	76.1411	8.03876	7.55786	7.99266	6.38303	6.39855	5.45041	CAGGAAAGTACTTAGAAACACCCCTTGACATACCAAAGAAAGTATAATTGGTGTTCATTT	2	-	2689009	2691681	ri|F630012J01|PL00014J06|2676	2676	NONMMUT040018;NONMMUT040019		NC	NC	0.425955	0.00909151	1.97573	down	210.326	159.332	163.489	408.77	239.627	346.832	7.15843	6.70938	6.77433	8.03876	7.55786	7.99266	CAGGAAAGTACTTAGAAACACCCCTTGACATACCAAAGAAAGTATAATTGGTGTTCATTT	2	-	2689009	2691681	ri|F630012J01|PL00014J06|2676
NONMMUT040583	0.722638	0.00423224	2.7335	up	605.484	358.676	321.294	206.863	184.511	198.253	8.60632	8.12092	7.88599	6.96451	6.52346	6.773	TGTTGTGGGTTCAGCTATCAGTATTACGGGCTGTGTGTTAAGAAACACGAGTGGATCAAT	2	-	3577349	3580127	ri|D230036K21|PX00189J19|2781	2781	NONMMUT040583	NC	NC	NC	0.484964	0.0194141	3.43134	down	66.8325	135.176	207.592	605.484	358.676	321.294	5.67203	6.48153	7.12335	8.60632	8.12092	7.88599	TGTTGTGGGTTCAGCTATCAGTATTACGGGCTGTGTGTTAAGAAACACGAGTGGATCAAT	2	-	3577349	3580127	ri|D230036K21|PX00189J19|2781
NONMMUT040618	0.72837	0.0090763	2.29544	up	203.32	221.769	167.724	131.316	97.34	102.314	7.01657	7.44947	6.97404	6.34681	5.68669	5.81027	CTCAGACCTTTAATCGTGTATATTTTAACTCAATATTTCCCAAACTGTGCCATTGCTACA	2	-	154411925	154413113	NONMMUT040618	1190	NONMMUT040618	NONMMUG025180.2	NC	1	0.489312	0.0206378	1.63963	down	123.985	151.596	112.859	203.32	221.769	167.724	6.42591	6.64103	6.23303	7.01657	7.44947	6.97404	CTCAGACCTTTAATCGTGTATATTTTAACTCAATATTTCCCAAACTGTGCCATTGCTACA	2	-	154411925	154413113	NONMMUT040618
NONMMUT040619	0.784331	0.0451881	2.05634	up	742.727	435.71	340.75	329.781	394.872	215.161	8.89879	8.39527	7.96758	7.6066	7.63713	6.89767	GTTTAAAGAGGCCAACCAGGATGACTGGGATGTTTGAACTTTGTGAACACTTTTAAAAAA	2	-	4749899	4751244	ri|2510019K15|ZX00060I21|1348	1348	NONMMUT040619	NC	NC	NC	0.542416	0.0370498	1.82108	down	261.003	328.924	264.21	742.727	435.71	340.75	7.4609	7.7172	7.48918	8.89879	8.39527	7.96758	GTTTAAAGAGGCCAACCAGGATGACTGGGATGTTTGAACTTTGTGAACACTTTTAAAAAA	2	-	4749899	4751244	ri|2510019K15|ZX00060I21|1348
NONMMUT044365	0.722638	0.00384875	4.10648	up	254.643	251.234	175.584	86.9479	62.2763	38.7325	7.34053	7.62335	7.0385	5.83497	5.22986	4.82384	GGACAGACTACCATACAAAGAATGAACCATACAATGTGTGTATAGCTATGTTATTAGGAA	3	+	98090911	98094600	NONMMUT044365	3810	NONMMUT044365	NONMMUG027379.2	NC	4	0.460147	0.013296	3.72148	down	46.0521	27.188	111.168	254.643	251.234	175.584	5.31042	4.79303	6.2113	7.34053	7.62335	7.0385	GGACAGACTACCATACAAAGAATGAACCATACAATGTGTGTATAGCTATGTTATTAGGAA	3	+	98090911	98094600	NONMMUT044365
NONMMUT045047	0.72837	0.00487537	2.19142	up	713.83	476.657	402.793	308.346	342.911	267.073	8.83819	8.52797	8.20837	7.51454	7.43566	7.22873	TAGGGTAACAATTCCTAAGTTTTGCCAAGAAAATAGAGCATGTTCTAAAGCCCCTTTTGA	3	-	121490418	121491490	NONMMUT045047	1071	NONMMUT045047	NONMMUG027796.2	NC	1	0.556481	0.0420288	1.57813	down	299.85	436.113	335.75	713.83	476.657	402.793	7.65869	8.10435	7.83686	8.83819	8.52797	8.20837	TAGGGTAACAATTCCTAAGTTTTGCCAAGAAAATAGAGCATGTTCTAAAGCCCCTTTTGA	3	-	121490418	121491490	NONMMUT045047
NONMMUT046052	0.752544	0.022316	2.84568	up	278.332	272.82	280.852	182.182	149.014	71.6437	7.47385	7.73916	7.70006	6.7846	6.22248	5.37967	CATTTGTACATAAGACAGGCATTCAACAGTACAGTAATACTCTAATATGTGTGGTTCATG	4	+	6615073	6639357	NONMMUT046052	1326	NONMMUT046052	NONMMUG028432.2	NC	6	0.428143	0.00944569	2.80334	down	61.5948	111.389	149.327	278.332	272.82	280.852	5.58467	6.22802	6.63894	7.47385	7.73916	7.70006	CATTTGTACATAAGACAGGCATTCAACAGTACAGTAATACTCTAATATGTGTGGTTCATG	4	+	6615073	6639357	NONMMUT046052
NONMMUT046059	0.762346	0.0281673	1.57769	up	271.459	237.09	224.977	226.966	231.473	159.382	7.43429	7.5426	7.38434	7.09334	6.85153	6.44291	AGAGCATCCTCACAAAGTCCTCAAGCAGATTGTTCCTGTGTATTTGTATCTTGAACCAAA	4	-	1772188	1774395	ri|A130055N14|PX00123J04|2209	2209	NONMMUT046059	NC	NC	NC	0.332089	0.000580248	2.32429	down	98.5501	133.343	104.288	271.459	237.09	224.977	6.12292	6.46385	6.12408	7.43429	7.5426	7.38434	AGAGCATCCTCACAAAGTCCTCAAGCAGATTGTTCCTGTGTATTTGTATCTTGAACCAAA	4	-	1772188	1774395	ri|A130055N14|PX00123J04|2209
NONMMUT048751	0.722638	0.00362872	2.28494	up	1047.43	875.402	1041.8	462.784	518.695	682.357	9.40018	9.38036	9.53927	8.07643	8.04253	8.62437	AAGTTCTCCATGAGGACAGACATGGAGCAGAGCAAGTCAAGGAGAGACAAAATATAGGTC	4	-	114002445	114005881	NONMMUT048751	574	NONMMUT048751	NONMMUG030265.2	NC	2	0.332089	0.000266934	1.75177	down	567.461	644.354	608.978	1047.43	875.402	1041.8	8.54998	8.64086	8.70252	9.40018	9.38036	9.53927	AAGTTCTCCATGAGGACAGACATGGAGCAGAGCAAGTCAAGGAGAGACAAAATATAGGTC	4	-	114002445	114005881	NONMMUT048751
NONMMUT051136	0.785134	0.0472359	1.98655	down	157.72	151.061	105.788	220.12	413.584	475.903	6.64958	6.91148	6.32331	7.05174	7.704	8.09942	CTCCATCCTAACTGGGTTCTTCTATATTCAGGACCTGTTTTTCTTAAAAATTACAAGAGA	5	-	4784753	4799094	NONMMUT051136	2148	NONMMUT051136	NONMMUG031691.2	NC	3	0.517001	0.0284132	1.87451	up	354.903	290.049	213.707	157.72	151.061	105.788	7.89327	7.54403	7.16661	6.64958	6.91148	6.32331	CTCCATCCTAACTGGGTTCTTCTATATTCAGGACCTGTTTTTCTTAAAAATTACAAGAGA	5	-	4784753	4799094	NONMMUT051136
NONMMUT052609	0.72837	0.00525857	2.19345	up	167.696	136.365	127.873	77.8162	107.223	59.2076	6.73689	6.7643	6.58038	5.70818	5.80353	5.17025	CTGGCTTTCCTGTAATGGTATATAATGCCCCTGTCTAATAAATCTAACCACATTTTTCTT	5	+	2707400	2711775	ri|C230086B08|PX00177N03|2173	2173	NONMMUT052609	NC	NC	NC	0.485332	0.0195602	1.80693	down	71.6665	113.974	63.3776	167.696	136.365	127.873	5.75022	6.25635	5.51438	6.73689	6.7643	6.58038	CTGGCTTTCCTGTAATGGTATATAATGCCCCTGTCTAATAAATCTAACCACATTTTTCTT	5	+	2707400	2711775	ri|C230086B08|PX00177N03|2173
NONMMUT053122	0.762346	0.0343444	1.75769	down	266.445	182.014	133.827	342.586	533.637	424.052	7.40828	7.16661	6.64309	7.65477	8.08152	7.92273	ACGATGATTTTACATATTCATACGATGCAGGGGATTAAACTCCTCTTTTTAACACTTGTC	5	+	93238496	93264862	NONMMUT053122	271	NONMMUT053122	NONMMUG032994.1	NC	2	0.460168	0.013914	2.01991	up	445.76	378.559	411.857	266.445	182.014	133.827	8.21184	7.91536	8.13366	7.40828	7.16661	6.64309	ACGATGATTTTACATATTCATACGATGCAGGGGATTAAACTCCTCTTTTTAACACTTGTC	5	+	93238496	93264862	NONMMUT053122
NONMMUT055246	0.722638	0.0019775	2.66978	up	2334.32	1593.73	1494.56	931.057	781.727	839.389	10.5805	10.2265	10.0393	9.02606	8.63879	8.93128	GGCAGACATCCTAAGACTGAGCTGCATCCCAACACCAGATGTTGACATATTCTAGTATTT	5	-	146685466	146688267	NONMMUT055246	2807	NONMMUT055246	NONMMUG034307.1	NC	1	0.56865	0.0480756	1.68174	down	1503.59	987.564	989.359	2334.32	1593.73	1494.56	9.94582	9.2303	9.42032	10.5805	10.2265	10.0393	GGCAGACATCCTAAGACTGAGCTGCATCCCAACACCAGATGTTGACATATTCTAGTATTT	5	-	146685466	146688267	NONMMUT055246
NONMMUT055607	0.736888	0.0158583	1.75021	up	537.26	392.705	427.205	371.872	395.508	251.898	8.43611	8.24556	8.29234	7.77111	7.64074	7.13958	AAATGTCTCTTGTCTCCCAGTTGCATAGCGCTAGAATGTTCCAGTTCAAATTGGTTTTTT	6	-	5227501	5230334	NONMMUT055607	2834	NONMMUT055607	NONMMUG034517.2	NC	1	0.501341	0.0224138	1.73922	down	345.168	300.377	208.117	537.26	392.705	427.205	7.85587	7.59554	7.12729	8.43611	8.24556	8.29234	AAATGTCTCTTGTCTCCCAGTTGCATAGCGCTAGAATGTTCCAGTTCAAATTGGTTTTTT	6	-	5227501	5230334	NONMMUT055607
NONMMUT055609	0.784331	0.0446612	1.93269	up	895.505	727.759	1121.46	827.584	646.332	410.91	9.17635	9.13329	9.64343	8.86536	8.36046	7.8754	GCCATGAGGGAGGTCTTTATTTGAGAGGGATGTATGTTTGGTTTATTTGTTCATTTGAGG	6	-	290393	292906	ri|A530095I03|PX00143K09|2514	2514	NONMMUT055609	NC	NC	NC	0.480137	0.0173572	1.62186	down	652.273	637.828	528.406	895.505	727.759	1121.46	8.74008	8.62738	8.49265	9.17635	9.13329	9.64343	GCCATGAGGGAGGTCTTTATTTGAGAGGGATGTATGTTTGGTTTATTTGTTCATTTGAGG	6	-	290393	292906	ri|A530095I03|PX00143K09|2514
NONMMUT056550	0.72837	0.00595094	2.63377	up	212.619	121.878	220.977	83.92	69.6761	95.8328	7.08048	6.60651	7.3602	5.79354	5.33685	5.72541	CAGAGTTCAGGCTCCTTACCTCAGTACTTTCACTATATTTTCTCCTTTCAAAAGTTGTTC	6	-	39629706	39631763	NONMMUT056550	2060	NONMMUT056550	NONMMUG035117.2	NC	1	0.396034	0.00445349	2.44347	down	67.0518	71.6296	81.2769	212.619	121.878	220.977	5.67557	5.70636	5.79846	7.08048	6.60651	7.3602	CAGAGTTCAGGCTCCTTACCTCAGTACTTTCACTATATTTTCTCCTTTCAAAAGTTGTTC	6	-	39629706	39631763	NONMMUT056550
NONMMUT057158	0.72837	0.0119077	7.48212	down	26.27	30.8099	30.0428	250.145	1060.03	234.565	4.71575	4.97624	4.94615	7.2267	9.09439	7.02739	ATTCTATCATGGGCTCTTCACAGTCAGTGATCACTGCATTACAGGCAGTGCTAAAGCAAC	6	+	58280771	58281304	NONMMUT057158	387	NONMMUT057158	NONMMUG035476.2	NC	2	0.474622	0.0161932	3.92959	up	293.881	193.703	91.9183	26.27	30.8099	30.0428	7.62957	6.97665	5.95506	4.71575	4.97624	4.94615	ATTCTATCATGGGCTCTTCACAGTCAGTGATCACTGCATTACAGGCAGTGCTAAAGCAAC	6	+	58280771	58281304	NONMMUT057158
NONMMUT061350	0.762346	0.0345058	1.81007	down	119.055	110.351	140.393	195.986	340.934	365.24	6.25705	6.47317	6.71398	6.88862	7.42696	7.69676	GGTCTTTAGATAGTGATCCCTTACCAGAGCATCCATGTTGCTAGATTAAAATTTAGCTAT	7	+	62343971	62345355	NONMMUT061350	1393	NONMMUT061350	NONMMUG038101.2	NC	1	0.457377	0.0128961	1.7596	up	230.809	205.742	273.874	119.055	110.351	140.393	7.28415	7.06474	7.54107	6.25705	6.47317	6.71398	GGTCTTTAGATAGTGATCCCTTACCAGAGCATCCATGTTGCTAGATTAAAATTTAGCTAT	7	+	62343971	62345355	NONMMUT061350
NONMMUT062256	0.730933	0.0138826	1.67451	up	192.372	205.504	186.183	146.732	188.439	128.195	6.93931	7.33816	7.11912	6.49267	6.55265	6.12004	TTTGTTACTGATGATTGCTCTGTGACCCTTTGCAACTCAAGGGAGATTGCCAGCCCTTTA	7	+	775863	777923	ri|4833416J08|PX00028K21|2063	2063	NONMMUT062256	NC	NC	NC	0.413719	0.00719809	1.60296	down	135.781	134.89	119.749	192.372	205.504	186.183	6.55556	6.47908	6.31974	6.93931	7.33816	7.11912	TTTGTTACTGATGATTGCTCTGTGACCCTTTGCAACTCAAGGGAGATTGCCAGCCCTTTA	7	+	775863	777923	ri|4833416J08|PX00028K21|2063
NONMMUT062527	0.778204	0.0415531	1.77204	up	692.475	669.89	604.275	665.601	424.463	388.212	8.79449	9.01529	8.7761	8.57199	7.74578	7.79186	GCCACCAACAGGAAGTACGTTTTTCTTAATCAGTATGTAATTATTTTTCTTGCACTTTGC	7	+	3713370	3715816	ri|D630034C16|PX00197J19|2449	2449	NONMMUT062527	NC	NC	NC	0.480137	0.0177862	1.82072	down	310.793	538.746	347.774	692.475	669.89	604.275	7.70645	8.40262	7.88327	8.79449	9.01529	8.7761	GCCACCAACAGGAAGTACGTTTTTCTTAATCAGTATGTAATTATTTTTCTTGCACTTTGC	7	+	3713370	3715816	ri|D630034C16|PX00197J19|2449
NONMMUT062567	0.722638	0.0042416	1.86683	up	783.862	696.429	676.883	413.756	491.445	577.697	8.97891	9.06805	8.93047	7.92285	7.96513	8.38768	AATCCAGCCTTGCTTGTGTGTCTGTGTAAGATGGCCACTTACAGATACAGGTATGCAGTT	7	-	91750131	91754239	NONMMUT062567	658	NONMMUT062567	NONMMUG038593.1	NC	2	0.480137	0.0175385	1.85395	down	367.104	353.994	546.914	783.862	696.429	676.883	7.93832	7.82103	8.54627	8.97891	9.06805	8.93047	AATCCAGCCTTGCTTGTGTGTCTGTGTAAGATGGCCACTTACAGATACAGGTATGCAGTT	7	-	91750131	91754239	NONMMUT062567
NONMMUT064391	0.731966	0.0145822	1.50969	up	523.108	365.005	372.138	353.022	426.574	299.767	8.39944	8.14308	8.09141	7.69501	7.75291	7.40324	ACATCTGCTCCCCAAATCTCTTCTTTTGTTAACCCATTTACATAATCTACTGAGTTGTCC	8	-	3177833	3181851	NONMMUT064391	4037	NONMMUT064391;NONMMUT064392	NONMMUG039734.2	NC	1	0.393283	0.00339246	1.77332	down	281.996	245.072	229.347	523.108	365.005	372.138	7.5687	7.31109	7.27478	8.39944	8.14308	8.09141	ACATCTGCTCCCCAAATCTCTTCTTTTGTTAACCCATTTACATAATCTACTGAGTTGTCC	8	-	3177833	3181851	NONMMUT064391
NONMMUT064997	0.752544	0.0222627	2.26762	up	771.79	560.879	625.681	423.062	512.146	234.578	8.95693	8.76931	8.82271	7.95396	8.0238	7.02764	GTGTGTATAAGTGTGTATAAGAGGCATTATTGTCTTAGAAGAGGAAAAATGTTCAGCTAG	8	-	777448	779282	ri|A430038O04|PX00135A20|1837	1837	NONMMUT064997	NC	NC	NC	0.36537	0.0018569	1.72476	down	444.754	430.136	350.36	771.79	560.879	625.681	8.2079	8.08903	7.89283	8.95693	8.76931	8.82271	GTGTGTATAAGTGTGTATAAGAGGCATTATTGTCTTAGAAGAGGAAAAATGTTCAGCTAG	8	-	777448	779282	ri|A430038O04|PX00135A20|1837
NONMMUT066194	0.72837	0.0124697	2.02243	down	446.2	253.311	263.112	804.989	739.974	920.94	8.1694	7.6352	7.60811	8.82802	8.55976	9.0732	CTGCCCTCTAACCTACCTATTTCTACGGTAACAATAAACTATGGTGGTTATTGTCAACAT	8	+	1997075	2000437	ri|C130093M03|PX00172K10|3359	3359	NONMMUT066194	NC	NC	NC	0.416324	0.00870444	2.04952	up	699.357	643.19	763.396	446.2	253.311	263.112	8.84351	8.63784	9.03721	8.1694	7.6352	7.60811	CTGCCCTCTAACCTACCTATTTCTACGGTAACAATAAACTATGGTGGTTATTGTCAACAT	8	+	1997075	2000437	ri|C130093M03|PX00172K10|3359
NONMMUT066765	0.72837	0.00862324	1.84146	up	808.759	562.697	500.031	395.166	418.267	474.579	9.02821	8.77355	8.51491	7.85843	7.72297	8.09271	TTCTTCCATTGCAAAGTAGCATGACCCAGCCTCAAGTCTGTCTCTCTCTGTAATGGCTTT	8	+	96901772	96904214	NONMMUT066765	2445	NONMMUT066765	NONMMUG041323.1	NC	1	0.445524	0.0118355	1.75524	down	435.288	352.706	348.775	808.759	562.697	500.031	8.17873	7.81611	7.88682	9.02821	8.77355	8.51491	TTCTTCCATTGCAAAGTAGCATGACCCAGCCTCAAGTCTGTCTCTCTCTGTAATGGCTTT	8	+	96901772	96904214	NONMMUT066765
NONMMUT068807	0.785134	0.0484579	1.52742	up	226.715	177.843	199.147	202.441	191.186	134.174	7.17381	7.13326	7.21443	6.93227	6.57318	6.18275	AGGCTTTTATTTAAGAGCACAGTAGCGCACACTCAATGTTAGAAGCTCCTGACTTAGTAG	9	+	43648542	43656659	NONMMUT068807	3312	NONMMUT068807	NONMMUG042584.2	NC	2	0.413719	0.00777863	1.56793	down	158.242	120.458	134.119	226.715	177.843	199.147	6.7664	6.32519	6.48331	7.17381	7.13326	7.21443	AGGCTTTTATTTAAGAGCACAGTAGCGCACACTCAATGTTAGAAGCTCCTGACTTAGTAG	9	+	43648542	43656659	NONMMUT068807
NONMMUT074297	0.722638	0.00431396	2.43105	up	843.758	1178.02	941.029	466.384	624.493	460.81	9.09233	9.79644	9.40084	8.08733	8.31154	8.04599	GAGCATCCAGTTATGCCAAAAAGGGGCAGGGGACAAACAACAAACAATGAATAAATGAAC	X	-	146871692	146875706	NONMMUT074297	1398	NONMMUT074297	NONMMUG046079.1	NC	2	0.504543	0.0236957	1.71312	down	548.896	706.638	602.195	843.758	1178.02	941.029	8.50283	8.76902	8.68787	9.09233	9.79644	9.40084	GAGCATCCAGTTATGCCAAAAAGGGGCAGGGGACAAACAACAAACAATGAATAAATGAAC	X	-	146871692	146875706	NONMMUT074297
NONMMUT074572	0.621877	0.000504071	1.72042	down	120.625	90.9122	112.95	212.845	268.701	257.831	6.27602	6.21844	6.41258	7.00352	7.07648	7.17532	ACTGAGAGGAAATTGCCTTTAAAATAGAACCCTGAGTTGATCAGGCTGAAAACAAAAAAC	X	-	158544974	158546963	NONMMUT074572	1990	NONMMUT074572	NONMMUG046262.2	NC	1	0.413719	0.00811086	1.74669	up	226.953	236.229	166.149	120.625	90.9122	112.95	7.26097	7.26138	6.79858	6.27602	6.21844	6.41258	ACTGAGAGGAAATTGCCTTTAAAATAGAACCCTGAGTTGATCAGGCTGAAAACAAAAAAC	X	-	158544974	158546963	NONMMUT074572
ri|1110039N05|R000018G13|1079	0.621877	0.00102746	1.76663	up	2768.29	2034.61	2161	1761.39	1685.14	1544.31	10.8303	10.5691	10.5763	9.91524	9.76716	9.83034	CTGGGAGGCCCTGTCTCAAAACAAAACAAAAAATCATTTAGATGCATTTTGTGTCCTCTA	17	-	3424096	3425176	ri|1110039N05|R000018G13|1079	1079	NC	NC	NC	NC	0.360338	0.00140381	1.93503	down	1136.54	1517.62	1222	2768.29	2034.61	2161	9.55016	9.84289	9.7256	10.8303	10.5691	10.5763	CTGGGAGGCCCTGTCTCAAAACAAAACAAAAAATCATTTAGATGCATTTTGTGTCCTCTA	17	-	3424096	3425176	ri|1110039N05|R000018G13|1079
ri|4932415E21|PX00017J05|2899	0.758738	0.0262179	1.56161	up	1128.92	790.409	1066.99	932.525	915.956	626.415	9.50762	9.24754	9.57149	9.02879	8.8732	8.49556	TTTTAAGTCTGAGCATAAACTGGGGTACACATTACAAGACCACGTATCCAAAACAAACAA	18	+	1790609	1807523	ri|4932415E21|PX00017J05|2899	2899	NC	NC	NC	NC	0.460147	0.0132901	1.90108	down	705.246	584.365	424.183	1128.92	790.409	1066.99	8.85409	8.51351	8.17861	9.50762	9.24754	9.57149	TTTTAAGTCTGAGCATAAACTGGGGTACACATTACAAGACCACGTATCCAAAACAAACAA	18	+	1790609	1807523	ri|4932415E21|PX00017J05|2899
ri|A530099A19|PX00660E12|1213	0.722638	0.00233877	5.73732	up	1574.49	1213.74	1339.75	352.258	441.854	184.178	9.98759	9.84002	9.88889	7.69224	7.80272	6.66042	GTCTGGTTCTGTTTCATGGGTGGTGACACACAGGAATATTAAAATGTTCTCTGCAAGTCC	2	+	3323072	3324458	ri|A530099A19|PX00660E12|1213	1213	NC	NC	NC	NC	0.490633	0.0211658	2.39613	down	944.386	440.102	544.632	1574.49	1213.74	1339.75	9.2789	8.11684	8.53864	9.98759	9.84002	9.88889	GTCTGGTTCTGTTTCATGGGTGGTGACACACAGGAATATTAAAATGTTCTCTGCAAGTCC	2	+	3323072	3324458	ri|A530099A19|PX00660E12|1213
ri|B930029J24|PX00725B20|3477	0.736888	0.0174968	1.5795	down	177.095	121.001	125.003	225.376	382.05	273.296	6.81518	6.59776	6.5479	7.08374	7.58899	7.26651	GCCACTGGTGGAAAATTTAGTTCTATGGTTACCTGCTCTAAGACAAAAACTTTTATTTCA	9	-	267065	302778	ri|B930029J24|PX00725B20|3477	3477	NC	NC	NC	NC	0.386794	0.00245601	1.97896	up	344.639	269.437	289.252	177.095	121.001	125.003	7.85317	7.43994	7.62195	6.81518	6.59776	6.5479	GCCACTGGTGGAAAATTTAGTTCTATGGTTACCTGCTCTAAGACAAAAACTTTTATTTCA	9	-	267065	302778	ri|B930029J24|PX00725B20|3477
ri|C230048A08|PX00174N03|3754	0.72837	0.0118251	2.24968	up	403.257	259.243	347.781	182.115	155.725	248.141	8.02151	7.67087	7.99855	6.78403	6.28349	7.11426	GTTCTTTCTACTCAGTAATCCTCACTTTGGTCTTGAAGTTTAAATGTAATTTCAGCTACC	4	+	1631554	1633933	ri|C230048A08|PX00174N03|3754	3754	NC	NC	NC	NC	0.460147	0.0135454	1.72121	down	197.615	180.763	246.431	403.257	259.243	347.781	7.07332	6.88067	7.38668	8.02151	7.67087	7.99855	GTTCTTTCTACTCAGTAATCCTCACTTTGGTCTTGAAGTTTAAATGTAATTTCAGCTACC	4	+	1631554	1633933	ri|C230048A08|PX00174N03|3754
ri|C730015M21|PX00685B15|3755	0.72837	0.00493508	3.37359	up	554.521	894.709	722.318	266.129	341.805	216.772	8.47993	9.40817	9.02488	7.31163	7.4304	6.9081	GGGGCAGGGGAATTACTGAAATGAACAGTGTCTTGAAGAAAAGTAAAGTGTTTGTGTTTT	10	-	73451	77204	ri|C730015M21|PX00685B15|3755	3755	NC	NC	NC	NC	0.478641	0.0170985	2.13482	down	323.317	405.568	342.969	554.521	894.709	722.318	7.76168	8.0048	7.86416	8.47993	9.40817	9.02488	GGGGCAGGGGAATTACTGAAATGAACAGTGTCTTGAAGAAAAGTAAAGTGTTTGTGTTTT	10	-	73451	77204	ri|C730015M21|PX00685B15|3755
ri|D830014E11|PX00198J22|2979	0.785134	0.0484046	1.66246	up	170.38	179.192	168.033	158.002	157.088	100.531	6.75846	7.14429	6.97626	6.59542	6.29674	5.78689	AAGGTCTTTTAGAGCTGGAGCCAAAAGACGCTGTAAAGGGTGACGGTGTTGAGTCTTTAA	5	+	929510	937433	ri|D830014E11|PX00198J22|2979	2979	NC	NC	NC	NC	0.332089	0.000979887	2.01374	down	81.1005	90.5246	94.7783	170.38	179.192	168.033	5.88457	5.96756	5.99724	6.75846	7.14429	6.97626	AAGGTCTTTTAGAGCTGGAGCCAAAAGACGCTGTAAAGGGTGACGGTGTTGAGTCTTTAA	5	+	929510	937433	ri|D830014E11|PX00198J22|2979
ri|E130209N16|PX00092J11|2500	0.762346	0.0323572	1.62409	up	139.385	146.161	116.164	120.533	96.4419	99.6359	6.47138	6.86293	6.44701	6.23052	5.67592	5.77599	GGTCTGTGTGATTTCACACATGCACACTTATGATAATATGTTTGCATAAATGCAGTATAG	6	+	4760502	4763003	ri|E130209N16|PX00092J11|2500	2500	NC	NC	NC	NC	0.460979	0.0142041	1.57072	down	82	100.656	83.5532	139.385	146.161	116.164	5.89719	6.0981	5.83174	6.47138	6.86293	6.44701	GGTCTGTGTGATTTCACACATGCACACTTATGATAATATGTTTGCATAAATGCAGTATAG	6	+	4760502	4763003	ri|E130209N16|PX00092J11|2500
ri|E130309C16|PX00675O16|2969	0.72837	0.00904488	1.59397	up	208.587	162.323	184.996	145.183	137.255	172.476	7.05224	7.00969	7.11008	6.4787	6.11127	6.56414	CCTTCCATTGCTATATGACAAGTTTGAGGCTTATATCAGAAATAAAAATAAAGGCAGCAG	15	-	2807584	2822130	ri|E130309C16|PX00675O16|2969	2969	NC	NC	NC	NC	0.360338	0.00152234	2.22108	down	94.881	65.7338	97.132	208.587	162.323	184.996	6.07569	5.61449	6.02804	7.05224	7.00969	7.11008	CCTTCCATTGCTATATGACAAGTTTGAGGCTTATATCAGAAATAAAAATAAAGGCAGCAG	15	-	2807584	2822130	ri|E130309C16|PX00675O16|2969
ri|F730227K01|PL00020L01|1610	0.722638	0.00387379	2.72508	up	186.723	115.604	163.974	74.4642	45.4457	73.4866	6.89206	6.53532	6.94228	5.66032	4.96245	5.40799	GGGCCTGAACCCTTTTCACTTAGCTACATGGTCAGCTTACAATGTATGGTAGCTTAAATG	8	+	1005367	1006976	ri|F730227K01|PL00020L01|1610	1610	NC	NC	NC	NC	0.460168	0.0137252	3.20622	down	25.5723	24.9617	85.2748	186.723	115.604	163.974	4.84445	4.62535	5.85723	6.89206	6.53532	6.94228	GGGCCTGAACCCTTTTCACTTAGCTACATGGTCAGCTTACAATGTATGGTAGCTTAAATG	8	+	1005367	1006976	ri|F730227K01|PL00020L01|1610
ri|G370060F12|FL00003H11|3004	0.778204	0.0411034	1.55239	up	466.141	304.205	475.57	365.596	308.277	348.588	8.23173	7.88573	8.44137	7.74622	7.28211	7.62701	CTCCACAAGTACATGCACATACCCAATGAATTTACTTGCGCACACACAAAATAAATAAAT	16	-	2448799	2451800	ri|G370060F12|FL00003H11|3004	3004	NC	NC	NC	NC	0.357489	0.00129767	2.66844	down	175.266	157.023	156.983	466.141	304.205	475.57	6.90767	6.69093	6.71223	8.23173	7.88573	8.44137	CTCCACAAGTACATGCACATACCCAATGAATTTACTTGCGCACACACAAAATAAATAAAT	16	-	2448799	2451800	ri|G370060F12|FL00003H11|3004
ri|K430332D03|PL00175C23|983	0.762346	0.0287783	1.63586	up	699.193	429.565	484.849	443.599	502.136	322.491	8.80825	8.3731	8.4683	8.01609	7.99621	7.50721	GCATGGTGAAAATGAAGGCTCCTTAAAAGGCAAAACTAAAACCAGAGCCGGGAAGAGTAT	10	-	654752	655733	ri|K430332D03|PL00175C23|983	983	NC	NC	NC	NC	0.464598	0.0145327	2.01482	down	228.281	262.796	362.168	699.193	429.565	484.849	7.26885	7.40465	7.94419	8.80825	8.3731	8.4683	GCATGGTGAAAATGAAGGCTCCTTAAAAGGCAAAACTAAAACCAGAGCCGGGAAGAGTAT	10	-	654752	655733	ri|K430332D03|PL00175C23|983
RP23-175C13.2	0.72837	0.0081719	1.70665	up	564.762	667.481	568.566	432.621	521.048	406.001	8.50191	9.00876	8.69354	7.98334	8.04954	7.85783	AGATGAGGACACTGCTCTGTGATGTGATGCTTTGTGTTGATCATGCCTCTGGCCACCCTG	6	+	4782196	4782404	NONMMUT055592	209	NONMMUT055592	NONMMUG034505.2	RP23-175C13.2	1	0.510379	0.0245991	1.69078	down	470.144	340.768	345.988	564.762	667.481	568.566	8.28502	7.76918	7.87695	8.50191	9.00876	8.69354	AGATGAGGACACTGCTCTGTGATGTGATGCTTTGTGTTGATCATGCCTCTGGCCACCCTG	6	+	4782196	4782404	NONMMUT055592
[truncated: 5 more columns]

## Sheet: common mRNAs in intestine
		Table SV. List of common lncRNAs and mRNAs in the AM group vs NC group and the H-CP group vs AM group in the intestine.
ProbeName	GeneSymbol	AM group vs. NC group										H-CP group vs. AM group
		P-value (Corr)	P-valule	FC (abs)	Regulation	PC-1C:rProcessedSignal(normalized)	PC-2C:rProcessedSignal(normalized)	PC-3C:rProcessedSignal(normalized)	NX-2C:rProcessedSignal(normalized)	NX-3C:rProcessedSignal(normalized)	NC-1C:rProcessedSignal(normalized)	P-value (Corr)	P-value	FC (abs)	Regulation	GX-1C:rProcessedSignal(normalized)	GX-3C:rProcessedSignal(normalized)	GC-2C:rProcessedSignal(normalized)	PC-1C:rProcessedSignal(normalized)	PC-2C:rProcessedSignal(normalized)	PC-3C:rProcessedSignal(normalized)
A_55_P2163812	4-Sep	0.736888	0.017249	1.56623	down	6.73506	6.52048	6.69076	7.44322	7.45211	6.99286	0.556481	0.0428157	1.5374	up	7.64867	7.19681	6.9623	6.73506	6.52048	6.69076
A_55_P1960117	1190002N15Rik	0.72837	0.012755	3.3282	down	8.41033	7.85468	9.02836	10.2098	10.5241	9.76366	0.400729	0.00564034	4.66846	up	11.117	10.404	10.4412	8.41033	7.85468	9.02836
A_55_P2088720	1200016E24Rik	0.72837	0.0115386	2.56808	up	13.0341	13.3515	12.4196	11.6269	11.7893	11.3069	0.545639	0.0383318	1.85603	down	12.2401	11.8775	12.0109	13.0341	13.3515	12.4196
A_55_P2038358	Acot1	0.752459	0.0221622	3.75244	up	10.1991	9.82098	9.1272	8.55889	7.76445	7.10043	0.396034	0.00380956	4.45142	down	7.23576	7.63693	7.81179	10.1991	9.82098	9.1272
A_52_P525183	Acot2	0.72837	0.0114818	3.07158	up	10.2872	9.87368	9.53801	8.84634	8.14295	7.85266	0.386794	0.00299326	3.71086	down	8.0975	8.29791	7.62823	10.2872	9.87368	9.53801
A_55_P2038362	Acot5	0.621877	0.000797986	1.75908	up	7.88466	7.78112	7.69726	7.10918	6.871	6.93839	0.396034	0.00427671	2.38003	down	6.16773	6.55816	6.88422	7.88466	7.78112	7.69726
A_51_P463452	Acsl1	0.762346	0.0310495	1.9327	up	10.9364	10.6463	11.0343	10.3482	9.98732	9.42959	0.404854	0.00602924	1.70815	down	10.1086	10.2459	9.94519	10.9364	10.6463	11.0343
A_55_P1990346	Adamdec1	0.778204	0.0409553	1.8729	down	10.671	9.87426	10.2352	11.3296	11.3971	10.7695	0.460168	0.0137525	2.16808	up	11.4208	11.1267	11.5822	10.671	9.87426	10.2352
A_51_P209122	Agr2	0.762346	0.0335643	2.09442	up	11.4093	12.1106	11.2221	10.5066	10.174	10.8617	0.432656	0.00997914	2.8188	down	9.99862	10.4306	9.82756	11.4093	12.1106	11.2221
A_52_P311297	Als2	0.753888	0.0227109	1.53945	down	6.28857	6.55785	6.5945	7.34348	7.11718	6.84752	0.401548	0.00570676	2.38235	up	7.93752	7.31056	7.94999	6.28857	6.55785	6.5945
A_52_P853177	Angptl2	0.72837	0.00940153	1.54101	down	6.16498	6.5601	6.34926	7.10319	6.97665	6.86612	0.548049	0.039235	1.66692	up	7.46458	7.1046	6.71672	6.16498	6.5601	6.34926
A_52_P97572	Aplnr	0.758738	0.024873	1.55014	down	8.0174	8.09828	7.85999	8.30049	8.71861	8.85376	0.402537	0.00583169	1.55077	up	8.74502	8.43724	8.69237	8.0174	8.09828	7.85999
A_52_P239086	Apol10a	0.72837	0.0120353	5.36826	down	8.435	7.6523	8.34538	10.0019	11.5606	10.1435	0.554841	0.0414658	2.42689	up	9.11789	9.02295	10.1292	8.435	7.6523	8.34538
A_66_P110633	Apol9b	0.736888	0.0165331	1.64218	up	9.68636	9.95791	10.248	9.30087	9.35078	9.0938	0.460168	0.0140932	1.70919	down	9.02671	9.20677	9.33887	9.68636	9.95791	10.248
A_55_P1965574	BC048546	0.72837	0.00520187	1.59129	up	7.24405	7.13293	7.47716	6.58827	6.73979	6.5155	0.446778	0.0121831	1.57327	down	6.82825	6.44405	6.62055	7.24405	7.13293	7.47716
A_52_P39505	C1s2	0.728658	0.0135838	1.63031	down	6.37846	5.9011	6.12196	6.9939	6.8568	6.66624	0.474622	0.0161034	1.68893	up	7.06288	6.6374	6.96957	6.37846	5.9011	6.12196
A_55_P2305525	C81189	0.758738	0.0259398	1.64547	up	8.6456	8.30483	8.41471	7.85266	7.97748	7.3795	0.50249	0.022983	1.70107	down	7.48112	7.5198	8.06489	8.6456	8.30483	8.41471
A_55_P2165120	Cblb	0.783595	0.0429633	1.6093	up	8.69836	8.47652	8.55227	8.30718	7.82646	7.5342	0.38315	0.00216279	1.6131	down	7.95116	7.96732	7.73916	8.69836	8.47652	8.55227
A_51_P261999	Ccdc166	0.722638	0.00253815	2.43067	up	9.43252	8.9205	9.07445	8.04151	7.64722	7.89467	0.43399	0.0102626	2.83659	down	7.48569	7.22625	8.20306	9.43252	8.9205	9.07445
A_55_P2177697	Ccdc24	0.758738	0.0250705	1.82376	up	11.329	11.466	11.2573	10.0558	10.5077	10.8881	0.557179	0.043455	1.70648	down	10.4718	10.198	11.0695	11.329	11.466	11.2573
A_55_P1988183	Cdkn2b	0.691103	0.00150338	1.76001	down	8.3578	8.37514	8.58559	9.40572	9.1954	9.16417	0.514696	0.0268949	1.64977	up	9.55856	8.9658	8.96096	8.3578	8.37514	8.58559
A_55_P2156350	Clcn5	0.72837	0.00743439	1.59522	down	10.1456	10.1401	10.3059	11.1154	10.7724	10.7251	0.332089	0.000793305	1.52098	up	10.7836	10.8748	10.7482	10.1456	10.1401	10.3059
A_55_P2060379	Col15a1	0.785134	0.0491025	1.74246	down	6.45078	6.01148	5.66132	7.15834	6.56086	6.80775	0.5595	0.0457833	2.33592	up	7.86981	7.30582	6.61993	6.45078	6.01148	5.66132
A_51_P515605	Col3a1	0.762346	0.0338846	2.18073	down	10.9312	10.7511	9.88782	11.5726	11.4358	11.9361	0.513292	0.0261436	2.66185	up	12.4343	11.6061	11.767	10.9312	10.7511	9.88782
A_55_P2016540	Cry2	0.736888	0.0151545	2.18562	up	7.30423	7.25899	7.27436	6.62078	6.1691	5.66357	0.332415	0.00104602	1.63397	down	6.4187	6.70077	6.59296	7.30423	7.25899	7.27436
A_55_P1977038	Cxcl9	0.72837	0.00644067	2.24658	down	9.31181	9.01324	8.93259	10.5018	10.3828	9.87616	0.415928	0.00844892	2.42006	up	10.4561	10.7161	9.91062	9.31181	9.01324	8.93259
A_66_P127161	Cyp2u1	0.722638	0.0021705	3.8959	down	8.06498	8.08152	8.73142	9.99862	10.5846	10.1805	0.484445	0.0186916	3.20846	up	10.1208	9.25378	10.549	8.06498	8.08152	8.73142
A_55_P2092030	Cyp4a10	0.779836	0.0422266	2.66054	up	9.52872	9.95722	9.04412	8.42784	7.30127	8.5658	0.549944	0.0397333	3.46079	down	7.08364	8.781	7.29213	9.52872	9.95722	9.04412
A_55_P1952399	Cyp4a31	0.783595	0.0437749	2.81274	up	9.19773	9.60194	8.79582	8.15948	6.79195	8.16813	0.54395	0.0374927	3.57628	down	6.6716	8.45378	6.95472	9.19773	9.60194	8.79582
A_55_P1987620	Cyp4a32	0.762346	0.0305682	2.72625	up	7.73531	8.34286	7.36077	6.53764	5.71733	6.84321	0.516602	0.0282822	2.60881	down	5.95194	6.97095	6.36588	7.73531	8.34286	7.36077
A_55_P2022812	Cyp4f17	0.762183	0.0271922	2.0489	down	7.9579	7.34483	7.1473	8.22562	8.85024	8.47872	0.489312	0.0202696	2.21213	up	8.9357	8.65798	8.29265	7.9579	7.34483	7.1473
A_55_P2142695	E330014E10Rik	0.730933	0.0142067	3.05406	down	5.35656	5.38181	5.20118	6.22778	6.99286	7.55109	0.332089	7.47716e-05	3.28532	up	6.91612	7.1971	6.97443	5.35656	5.38181	5.20118
A_55_P2000683	Eci2	0.785134	0.0476602	1.80477	up	9.40441	9.41985	9.3144	9.08756	8.43425	8.06139	0.332089	0.000305609	1.5632	down	8.67323	8.82074	8.71119	9.40441	9.41985	9.3144
A_55_P2089710	Ednrb	0.762346	0.0306296	1.70177	down	7.12567	7.25042	6.8705	8.26068	7.63736	7.64965	0.357334	0.00123868	1.88559	up	8.0196	7.98154	7.99048	7.12567	7.25042	6.8705
A_52_P271377	Efr3a	0.72837	0.00652876	1.56533	down	8.73248	8.72673	8.97706	9.64343	9.34695	9.38531	0.396034	0.0035176	1.66803	up	9.571	9.68914	9.39057	8.73248	8.72673	8.97706
A_55_P1960916	Egln3	0.752544	0.0225123	1.51853	down	7.89733	8.44286	8.28928	8.73629	8.85527	8.84593	0.474622	0.0160813	1.62506	up	8.9522	8.78266	8.99609	7.89733	8.44286	8.28928
A_55_P2269819	Fam107a	0.738768	0.0184165	3.10818	up	8.25078	8.096	7.2574	6.59825	6.44575	5.65196	0.569815	0.0488913	2.41459	down	7.07727	6.75633	5.95523	8.25078	8.096	7.2574
A_51_P425824	Fam132a	0.784331	0.0452275	2.74274	down	6.6127	7.12507	8.0872	8.93478	8.20756	9.04948	0.466511	0.015191	3.41734	up	8.95515	9.13508	9.05336	6.6127	7.12507	8.0872
A_55_P1952379	Fkbp5	0.621877	0.00111826	1.73816	up	10.8272	10.5736	10.5383	9.87015	9.79211	9.88408	0.396034	0.00382862	1.86245	down	9.52154	9.91669	9.80917	10.8272	10.5736	10.5383
A_52_P116006	Gda	0.72837	0.00959995	1.62863	down	10.7777	10.4126	10.4078	11.3834	11.2477	11.078	0.484445	0.0183243	2.9165	up	12.5601	12.3481	11.3226	10.7777	10.4126	10.4078
A_52_P431615	Gm1966	0.758738	0.025543	1.50319	down	11.0173	10.8061	11.2548	11.5051	11.8322	11.5051	0.568969	0.0483938	1.51055	up	11.7979	11.7795	11.2861	11.0173	10.8061	11.2548
A_51_P247496	Gm9767	0.621877	0.000681362	2.99113	up	11.0075	11.5546	11.3689	9.67995	9.69484	9.81405	0.460168	0.0137788	2.21031	down	9.74059	10.2773	10.4803	11.0075	11.5546	11.3689
A_55_P2003658	Gnpda1	0.736888	0.0154747	1.61319	down	9.5417	9.41957	9.58721	10.3894	10.3475	9.88132	0.332089	0.000952258	1.79816	up	10.5137	10.2268	10.3475	9.5417	9.41957	9.58721
A_55_P2063736	Gp49a	0.736888	0.0173859	1.61432	down	6.15866	5.87136	6.39567	6.73001	6.75468	7.0138	0.528555	0.0322221	1.99549	up	7.40465	6.5993	7.41198	6.15866	5.87136	6.39567
A_52_P554703	Gprin3	0.762346	0.0335152	1.60735	down	9.18914	9.25798	9.60677	10.2667	10.1419	9.69936	0.396034	0.004005	1.75484	up	10.1573	10.0902	10.2404	9.18914	9.25798	9.60677
A_55_P2161423	Hif3a	0.738028	0.018028	1.58116	up	6.65161	6.60325	6.95976	6.07945	6.3002	5.85204	0.465487	0.0146239	1.74188	down	5.72863	5.83416	6.24989	6.65161	6.60325	6.95976
A_55_P2109033	Hmgcs2	0.783595	0.0433953	2.71947	up	10.2062	10.046	9.26738	8.76084	8.83323	7.59554	0.408176	0.00661265	3.55419	down	8.29932	7.62177	8.10994	10.2062	10.046	9.26738
A_51_P410205	Hsd11b2	0.778204	0.0413397	1.91366	up	8.90947	9.26192	9.89885	8.67122	8.31732	8.27271	0.519768	0.0297385	2.14615	down	8.42179	8.41789	7.92532	8.90947	9.26192	9.89885
A_55_P2157902	Igsf10	0.72837	0.0133405	2.7393	down	9.10116	8.3223	8.49398	10.2712	10.4071	9.60057	0.409953	0.00678163	2.85334	up	10.5022	9.96835	9.98485	9.10116	8.3223	8.49398
A_52_P16563	Lsm14b	0.785134	0.0463712	1.54293	down	6.42994	6.85831	6.69599	7.6426	7.16387	7.0548	0.396034	0.00385777	1.77122	up	7.49855	7.38199	7.57795	6.42994	6.85831	6.69599
A_55_P1990505	Masp2	0.784331	0.0447351	2.05746	up	7.36676	7.33036	7.1177	6.73622	6.40281	5.55321	0.528624	0.0323083	1.7045	down	6.82799	6.61084	6.06794	7.36676	7.33036	7.1177
A_51_P418317	Mis12	0.783595	0.044089	1.56106	down	8.42883	8.56412	8.21432	9.43832	8.85391	8.84262	0.396034	0.0050258	1.61842	up	9.20743	9.11968	8.96392	8.42883	8.56412	8.21432
A_52_P507214	Mmp9	0.722638	0.0029198	1.62643	down	5.6239	5.81218	5.48287	6.4269	6.24989	6.34728	0.417648	0.00877838	2.1732	up	7.03536	6.33816	6.90488	5.6239	5.81218	5.48287
A_55_P1985433	Nrg1	0.72837	0.00830243	2.04857	up	7.26761	7.31286	7.30295	6.65833	6.18918	5.93207	0.386794	0.00271587	1.53016	down	6.86198	6.61613	6.56425	7.26761	7.31286	7.30295
A_51_P436790	Olfr1537	0.736888	0.0167225	2.10413	up	8.54328	8.20801	8.67441	7.48394	7.7583	6.96379	0.511366	0.0248088	1.82989	down	7.94716	7.2335	7.62977	8.54328	8.20801	8.67441
A_55_P2127015	Olfr720	0.762346	0.0332643	1.51673	up	8.55932	8.9806	8.85784	7.91758	8.36168	8.31561	0.569815	0.0495129	1.62641	down	7.67723	8.20357	8.41189	8.55932	8.9806	8.85784
A_51_P100309	Oprm1	0.691103	0.00171645	3.41594	up	7.18678	6.60313	7.07706	5.47147	4.93739	5.14126	0.386794	0.00308664	3.90591	down	4.62453	4.87629	5.46919	7.18678	6.60313	7.07706
A_51_P114693	Parm1	0.775242	0.0375344	1.57447	up	8.9376	8.72612	8.37948	8.1174	7.75376	8.20746	0.514956	0.027146	1.78687	down	7.93648	8.10637	7.48806	8.9376	8.72612	8.37948
A_51_P508959	Prr15	0.778204	0.040336	1.7188	down	9.26953	9.35789	9.69109	10.2661	10.5907	9.80598	0.451921	0.0124747	1.57145	up	9.99778	10.0271	10.2499	9.26953	9.35789	9.69109
A_55_P2025611	Psme2b	0.762346	0.0286587	1.54097	down	10.8257	10.5397	10.8492	11.4408	11.587	11.0583	0.514925	0.0271121	1.59246	up	11.7312	11.3441	11.153	10.8257	10.5397	10.8492
A_55_P2130463	Ptgdr2	0.783595	0.0431582	1.60869	up	6.97377	7.40465	6.98456	6.78494	6.37481	6.14557	0.565288	0.047282	1.60756	down	6.24905	6.82784	6.23148	6.97377	7.40465	6.98456
A_55_P2006327	Ptprg	0.762346	0.0341738	1.6292	down	6.6918	6.469	6.43901	7.57761	7.27487	6.85981	0.413351	0.00691559	1.6784	up	7.48403	7.29618	7.06087	6.6918	6.469	6.43901
A_55_P2038139	Ptprj	0.621877	0.000252573	1.9065	down	9.72904	9.80082	9.59187	10.5922	10.5949	10.7274	0.437429	0.0105596	1.57625	up	10.6239	10.2036	10.2636	9.72904	9.80082	9.59187
A_55_P2035315	Rasgef1b	0.722638	0.00188028	1.75004	up	7.1322	7.16577	7.43577	6.45477	6.52248	6.33432	0.392337	0.00336146	1.57661	down	6.66398	6.58407	6.51522	7.1322	7.16577	7.43577
A_51_P327934	Rfx2	0.736888	0.0152944	3.04272	up	7.46338	7.68066	8.40765	6.70167	6.27623	5.7577	0.396034	0.004087	3.30408	down	6.21416	6.14907	6.01572	7.46338	7.68066	8.40765
A_51_P260683	Rgs1	0.785134	0.0479991	2.26076	up	7.19966	6.79118	7.51604	6.52284	6.15162	5.30201	0.503931	0.023583	1.75493	down	6.53457	6.28545	6.25261	7.19966	6.79118	7.51604
A_55_P2051094	Rorc	0.755244	0.022818	1.86351	up	11.1727	10.6171	10.9778	10.3142	10.0908	9.66852	0.490633	0.0212656	1.55995	down	10.1668	10.2926	10.3837	11.1727	10.6171	10.9778
A_51_P281089	S100a6	0.762346	0.0322312	2.53818	up	10.2802	9.47829	9.50866	8.08776	8.08763	9.06042	0.545639	0.0382883	2.55014	down	9.01972	7.77989	8.41584	10.2802	9.47829	9.50866
A_55_P2170514	Sfn	0.775478	0.0378734	1.63306	up	9.91524	9.84182	10.5646	9.36192	9.4596	9.37745	0.540621	0.0360111	1.73988	down	9.49682	9.33049	9.09741	9.91524	9.84182	10.5646
A_55_P2003603	Slc2a7	0.736888	0.015958	2.32064	down	9.18364	9.40368	9.40152	10.8044	10.8701	9.95791	0.360338	0.00154854	2.39163	up	10.4737	10.4103	10.8788	9.18364	9.40368	9.40152
A_55_P2081660	Spata17	0.748516	0.0209392	1.75399	up	9.11388	9.01649	8.82838	8.24688	8.48577	7.79418	0.530514	0.0326811	2.09958	down	7.31501	8.01197	8.42147	9.11388	9.01649	8.82838
A_55_P2085727	Stk38	0.755873	0.0228591	1.83943	up	7.82159	7.24494	7.05516	6.49342	6.35339	6.63711	0.554587	0.0410954	1.64864	down	6.80336	6.59783	6.55665	7.82159	7.24494	7.05516
A_51_P294807	Stom	0.72837	0.00540381	2.08182	down	7.78366	7.96867	8.31169	9.07275	9.28249	8.88232	0.404824	0.00600356	2.15113	up	9.39785	9.03957	8.94187	7.78366	7.96867	8.31169
A_52_P175376	Tfcp2l1	0.779116	0.0416607	1.70798	up	7.6517	7.09959	7.25709	6.96856	6.39031	6.33264	0.396034	0.00517292	2.89563	down	5.45645	5.73231	6.21799	7.6517	7.09959	7.25709
A_52_P291420	Tmc7	0.783595	0.0440085	1.85753	up	9.06821	8.68949	8.94456	8.45183	8.09942	7.47086	0.460147	0.0134059	1.61541	down	8.16182	8.43593	8.0288	9.06821	8.68949	8.94456
A_52_P571371	Tmem144	0.736888	0.0162665	1.75327	down	6.27822	6.67766	6.54005	7.59304	7.31432	7.01872	0.480137	0.0177773	1.7534	up	7.14848	7.12426	7.65364	6.27822	6.67766	6.54005
A_55_P2099279	Tmem29	0.72837	0.00611127	2.5496	up	9.14609	9.9307	9.76853	8.20317	8.4397	8.15164	0.490633	0.0212196	1.90833	down	8.76522	8.76803	8.51514	9.14609	9.9307	9.76853
A_55_P2030578	Tns1	0.758738	0.0251514	1.61628	up	8.7171	8.72438	8.57697	8.33063	7.94355	7.66624	0.516602	0.0277322	1.58127	down	8.1756	8.22573	7.63386	8.7171	8.72438	8.57697
A_55_P2032659	Tox	0.748528	0.0214996	2.13808	up	6.70576	7.06692	7.40828	6.34063	5.57885	5.97253	0.501341	0.0225702	1.72387	down	6.32341	6.38048	6.12013	6.70576	7.06692	7.40828
A_55_P2094262	Tph1	0.722638	0.00275648	2.47909	up	7.69774	7.87038	7.96254	6.87801	6.25301	6.4702	0.336785	0.00107864	2.80794	down	6.41529	6.59271	6.05412	7.69774	7.87038	7.96254
A_55_P2009988	Trib3	0.784331	0.04536	1.58839	down	6.49475	7.27374	6.82899	7.44029	7.63301	7.52688	0.528624	0.0322854	1.78497	up	7.66104	7.50247	7.94167	6.49475	7.27374	6.82899
A_55_P1963553	Vmn1r174	0.72837	0.00548325	2.84681	down	6.25096	6.47164	5.83191	7.31277	8.00676	7.76303	0.562042	0.046494	1.83873	up	7.32123	6.57386	7.29555	6.25096	6.47164	5.83191
A_55_P2024155	Zbtb16	0.722638	0.00265299	9.57423	up	9.12928	8.86165	9.18191	6.68864	5.66398	5.04276	0.336785	0.00108075	9.39943	down	5.39328	6.56155	5.52029	9.12928	8.86165	9.18191
